# Supplementary material for: Dynamic Changes in Sarcoplasmic Reticulum Structure in Ventricular Myocytes
Source: Hindawi journal article supplement (doi:10.1155/2011/382586), 2011-01-01
Supplement: f1 [file 382586.f1.zip]

Archive with 5 entries (5 files):
- 382586.f1/382586.f1.mov
- 382586.f1/382586.f2.mov
- 382586.f1/382586.f3.mov
- 382586.f1/382586.f4.mov
- 382586.f1/382586.f5.avi
